# Supplementary material
Source: PubMed Central journal article supplement (PMC2516218)
Supplement: 0711978105_0711978105SI.pdf [file 0711978105_0711978105SI.pdf]

# Supporting Information

Tebar *et al.* 10.1073/pnas.0711978105

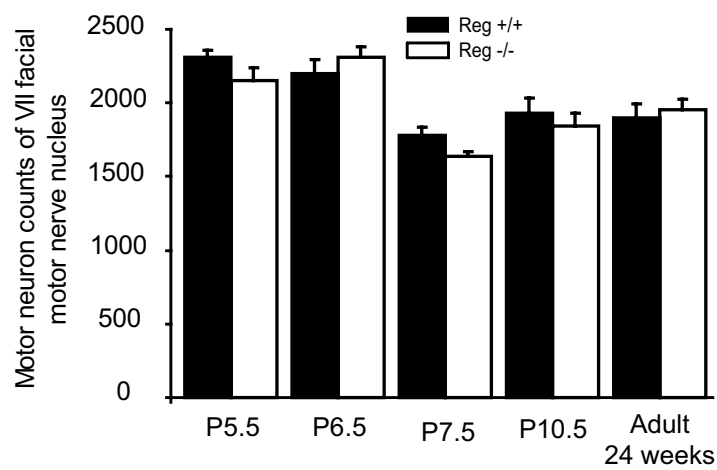

**Fig. S1.** Absence of motor neuron cell death in *RegIII $\beta$*  knockout mice in facial nerve nucleus at both early (P5.5 to P10.5) and late (24-week) time points ( $n = 12-18$  in each group). The data show mean  $\pm$  SEM.

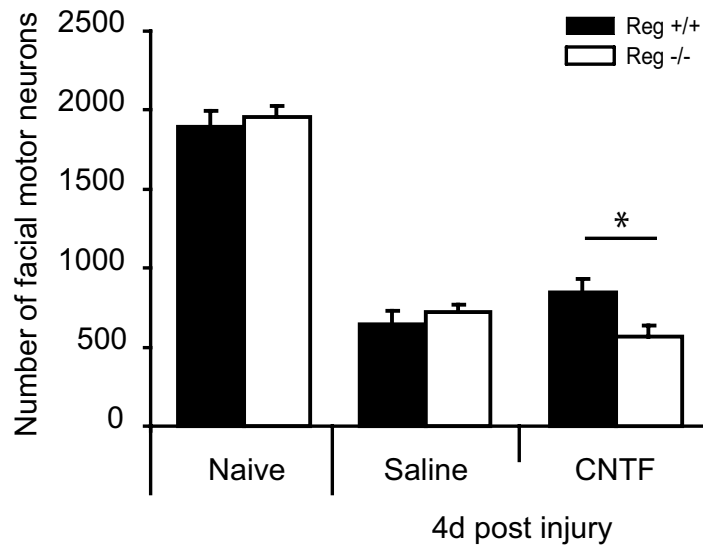

**Fig. S2.** Application of CNTF to the cut facial nerve results in increased survival of facial motor neurons in wild type compared to KO mice counted 4 days after nerve section. The data show mean  $\pm$  SEM ( $n = 4-5$  in each group). \*\*,  $P < 0.001$ .

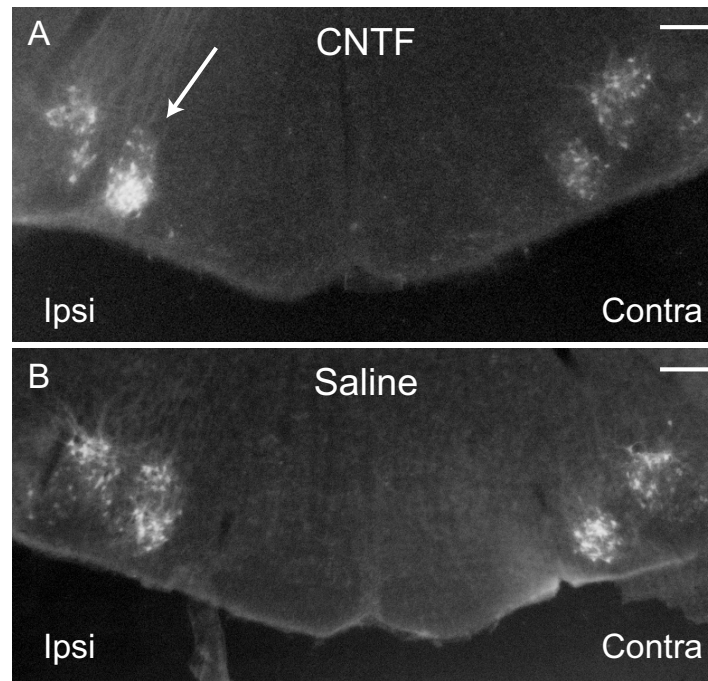

**Fig. S3.** RegIII $\beta$  positive neurons in wild-type mice after facial nerve cut and CNTF (A) or saline (B) application. The arrow indicates the increased number of RegIII $\beta$  positive neurons induced by CNTF. (Scale bar in A and B, 250  $\mu$ m.)

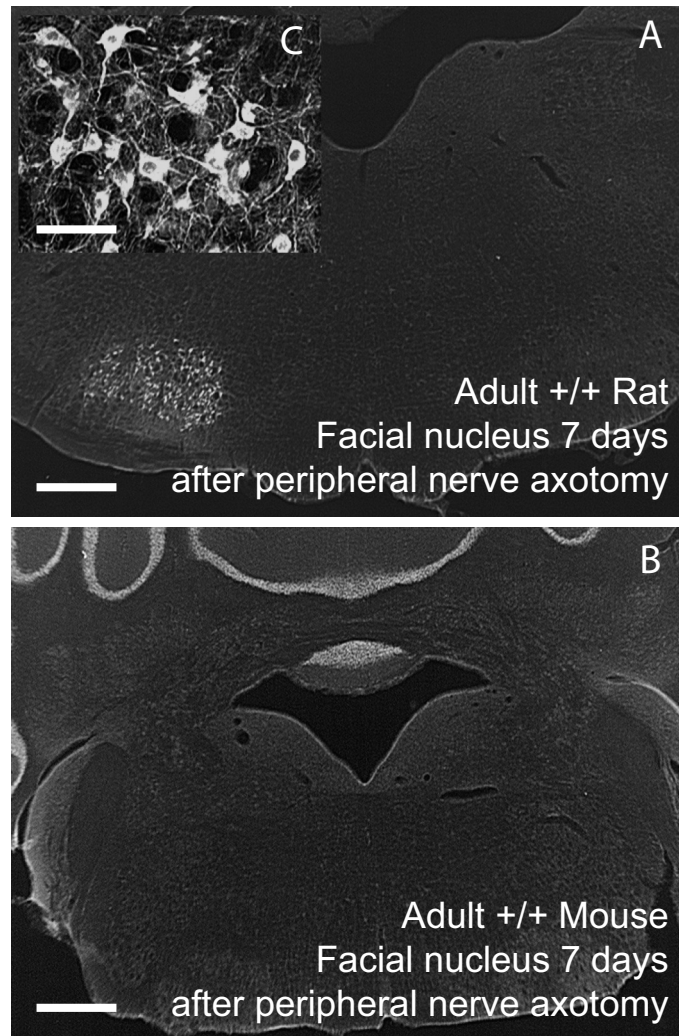

**Fig. 54.** RegIII $\beta$ /Reg2 is not re-expressed in adult mice following axotomy. (A) Section of the adult left facial nerve in rats results in the expression of RegIII $\beta$  in all facial motor neurons. In contrast, no expression of RegIII $\beta$  protein is seen in mouse after facial nerve section (B). (C) High-power magnification of labeled rat motor neurons. [Scale bars, 1 mm (A and B) and 100  $\mu$ m (C).]
